# Supplementary material for: Prenatal Household Air Pollution Exposure, Cord Blood Mononuclear Cell Telomere Length and Age Four Blood Pressure: Evidence from a Ghanaian Pregnancy Cohort
Source: MDPI journal article supplement (doi:10.3390/toxics9070169), 2021-07-14
Supplement: s1 [file s1]

## Article

# Supplementary Materials: Prenatal Household Air Pollution Exposure, Cord Blood Mono-nuclear Cell Telomere Length and Age Four Blood Pressure: Evidence from A Ghanaian Pregnancy Cohort

Seyram Kaali, Darby Jack, Jones Opoku-Mensah, Tessa Bloomquist, Joseph Aanaro, Ashlinn Quinn, Ellen Abrafi Boamah-Kaali, Patrick Kinney, Mohammed Nuhu Mujtaba, Oscar Agyei, Abena Konadu Yawson, Samuel Osei-Owusu, Rupert Delimini, Blair Wylie, Kenneth Ayuurebobi Ae-Ngibise, Andrea Baccarelli, Seth Owusu-Agyei, Steven N Chillrud, Kwaku Poku Asante and Alison Lee

**Table S1.** Participant Characteristics of larger telomere cohort.

| Continuous Variables<br>(Median, Interquartile<br>Range)           | All<br>( <i>n</i> = 138) | Male<br>( <i>n</i> = 68) | Female<br>( <i>n</i> = 70) |
|--------------------------------------------------------------------|--------------------------|--------------------------|----------------------------|
| Cord blood mononuclear<br>cell (CBMC) telomere<br>length*          | 0.68<br>0.56, 0.87       | 0.66<br>0.49, 0.81       | 0.69<br>0.59, 0.99         |
| CBMC storage time (years)                                          | 2.6<br>2.41, 2.83        | 2.63<br>2.41, 2.84       | 2.57<br>2.41, 2.78         |
| Prenatal household air pollution exposure**                        |                          |                          |                            |
| Carbon monoxide (CO),<br>ppm                                       | 0.85<br>0.51, 1.45       | 0.79<br>0.41, 1.34       | 1.01<br>0.68, 1.54         |
| Fine particulate matter<br>(PM <sub>2.5</sub> ), ug/m <sup>3</sup> | 57<br>38.4, 83.4         | 50.6<br>37.3, 82.2       | 61.3<br>42.2, 84           |
| Gestational Age at Delivery<br>(weeks)                             | 39.7<br>39, 40.7         | 39.7<br>39, 40.5         | 39.7<br>39, 40.7           |
| Maternal Characteristics                                           |                          |                          |                            |
| Age (years)                                                        | 25<br>22, 33             | 24<br>20, 32             | 27<br>23, 33               |
| Body Mass Index (kg/m <sup>2</sup> )                               | 22.7<br>21.1, 24.2       | 23.1<br>21.6, 24.6       | 22.3<br>20.8, 23.8         |
| Categorical Variables ( <i>n</i> , %)                              |                          |                          |                            |
| Cookstove intervention arm                                         |                          |                          |                            |
| Control                                                            | 63<br>45.7%              | 30<br>44.1%              | 33<br>47.1%                |
| Improved Biomass                                                   | 39<br>28.3%              | 20<br>29.4%              | 19<br>27.1%                |
| Liquefied Petroleum Gas                                            | 36<br>26.1%              | 18<br>26.5%              | 18<br>25.7%                |
| Maternal education                                                 |                          |                          |                            |
| None                                                               | 52<br>37.7%              | 24<br>35.3%              | 28<br>40%                  |
| Primary school or higher                                           | 86<br>62.3%              | 44<br>64.7%              | 42<br>60%                  |
| Ethnicity                                                          |                          |                          |                            |
| 1                                                                  | 36<br>26.1%              | 20<br>29.4%              | 16<br>22.9%                |
| 2                                                                  | 24<br>17.4%              | 12<br>17.6%              | 12<br>17.1%                |
| 3                                                                  | 40<br>29.0%              | 19<br>27.9%              | 21<br>30%                  |
| 4 (other)                                                          | 38<br>27.6%              | 17<br>25%                | 21<br>30%                  |

\*T/S ratio normalized against plate pool average, \*\*Personal exposure to household air pollution assessed by CO (*n* = 138) in parts per million and PM<sub>2.5</sub> (*n* = 81, Male *n* = 44, Female *n* = 37) in ug/m<sup>3</sup>.

**Table S2.** Sensitivity models examining the association between prenatal household air pollution measures as indexed by maternal personal CO and PM<sub>2.5</sub> measurements and GRAPHs study arm, considered separately, and log-transformed cord blood leukocyte telomere length: linear regression.

| HAP Exposure                       | Multipollutant Model |                 | + Second-Hand Smoke |                 | + Household SES    |                 |
|------------------------------------|----------------------|-----------------|---------------------|-----------------|--------------------|-----------------|
|                                    | $\beta$ (95% CI)     | <i>p</i> -Value | $\beta$ (95% CI)    | <i>p</i> -Value | $\beta$ (95% CI)   | <i>p</i> -Value |
| Average prenatal CO                | −9.5 (−30.2, 16.2)   | 0.41            | −1.0 (−18.9, 22.1)  | 0.92            | 0.1 (−19.7, 19.7)  | 0.99            |
| Average prenatal PM <sub>2.5</sub> | −3.9 (−8.6, −0.10)   | 0.048           | −5.8 (−9.5, −1.0)   | 0.02            | −5.8 (−9.5, −1.0)  | 0.02            |
| Cookstove Intervention Arm         |                      |                 |                     |                 |                    |                 |
| Control (open fire)                | –                    | –               | Ref                 | –               | Ref                | –               |
| Improved biomass stove             | –                    | –               | 13.9 (−12.2, 49.2)  | 0.32            | 18.5 (−9.5, 56.8)  | 0.21            |
| LPG                                | –                    | –               | 58.1 (15.6, 216)    | 0.003           | 71.6 (31.0, 124.8) | <.001           |

\*All models are adjusted for child sex, maternal education, maternal BMI, maternal age, ethnicity and CBMC storage time. CO models are interpreted as per 1ppm change. PM<sub>2.5</sub> models are interpreted as per 10ug/m<sup>3</sup> change.

**Table S3.** Larger cohort (*n* = 138) association between prenatal household measure as indexed by maternal personal CO and PM<sub>2.5</sub> measurements and GRAPHs study arm, considered separately, and log-transformed cord blood leukocyte telomere length: linear regression

| HAP Exposure                       | <i>n</i> | Univariate Model   |                 | Multivariable Model |                 |
|------------------------------------|----------|--------------------|-----------------|---------------------|-----------------|
|                                    |          | $\beta$ (95% CI)   | <i>p</i> -Value | $\beta$ (95% CI)    | <i>p</i> -Value |
| Average prenatal CO                | 138      | −1.0 (−7.6, 5.1)   | 0.70            | −2.0 (−8.6, 4.1)    | 0.47            |
| Average prenatal PM <sub>2.5</sub> | 81       | −3.9 (−6.8, 0.1)   | 0.054           | −3.9 (−7.7, −0.70)  | 0.02            |
| Sex-specific Associations          |          |                    |                 |                     |                 |
| Boys                               |          |                    |                 |                     |                 |
| Average prenatal CO                | 68       | −0.7 (−11.3, 11.1) | 0.90            | −3.7 (−14.7, 8.7)   | 0.53            |
| Average prenatal PM <sub>2.5</sub> | 44       | −4.2 (−9.3, 1.2)   | 0.12            | −5.4 (−11.5, 1.1)   | 0.10            |
| Girls                              |          |                    |                 |                     |                 |
| Average prenatal CO                | 70       | −2.3 (−10, 6)      | 0.57            | −4.6 (−12.4, 3.9)   | 0.27            |
| Average prenatal PM <sub>2.5</sub> | 37       | −4.1 (−9.2, 1.3)   | 0.13            | −3.3 (8.9, 2.7)     | 0.26            |
| Cookstove Intervention Arm         |          |                    |                 |                     |                 |
| Control (open fire)                | 63       | Ref                | --              | Ref                 | --              |
| Improved biomass stove             | 39       | 10.5 (−12.2, 39.1) | 0.37            | 9.4 (−13.1, 37.7)   | 0.46            |
| LPG                                | 36       | 29.7 (2.0, 63.2)   | 0.03            | 36.3 (7.3, 75.1)    | 0.01            |

\*Models are adjusted for child sex, maternal education, maternal BMI, maternal age, ethnicity and CBMC storage time. CO models are interpreted as percent change in CBMC telomere length per 1ppm increase in CO. PM<sub>2.5</sub> models are interpreted as percent change in relative telomere length per 10ug/m<sup>3</sup> increase in PM<sub>2.5</sub>.
